# Supplementary material for: The Release 6 reference sequence of the Drosophila melanogaster genome
Source: PubMed Central journal article supplement — Genome Res. 2015 Mar;25(3):445–58. doi: 10.1101/gr.185579.114 (PMC4352887; doi:10.1101/gr.185579.114), 2015-03

### X20B

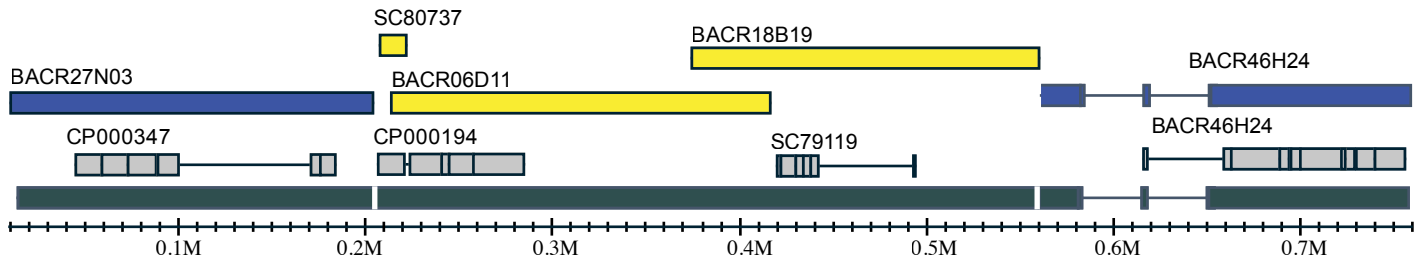

### XHet.1

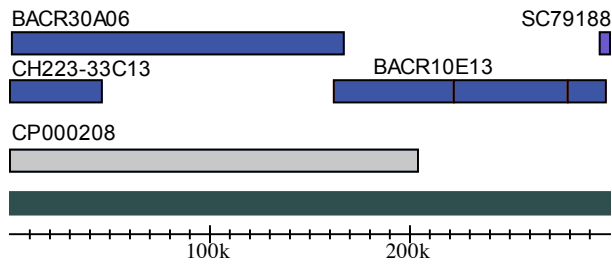

### XHet.2

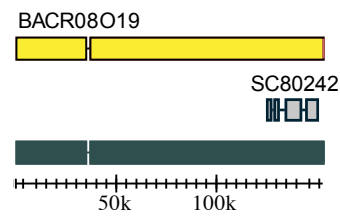

### XHet.3

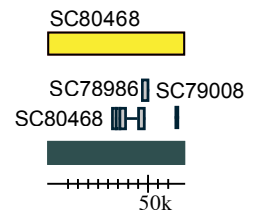

### 2LHet.1

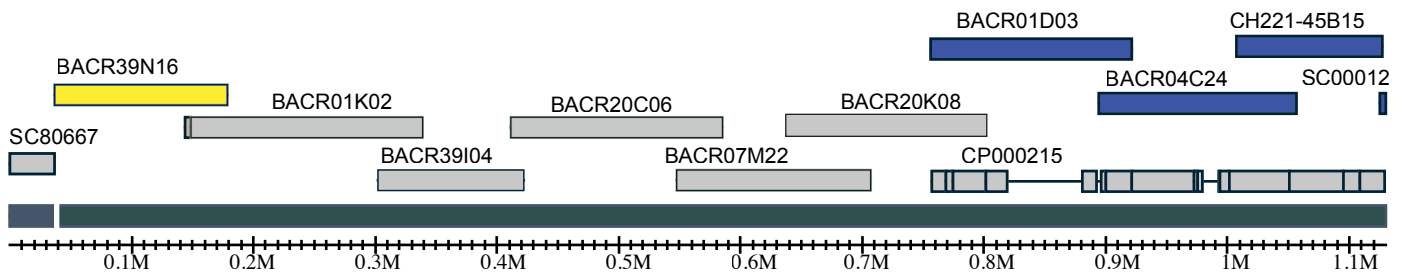

### 2RHet.1

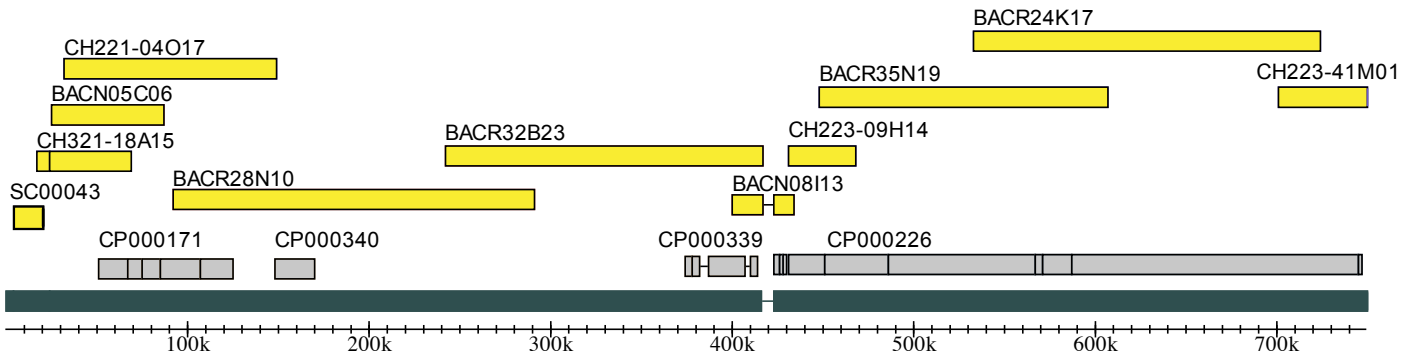

### 2RHet.2

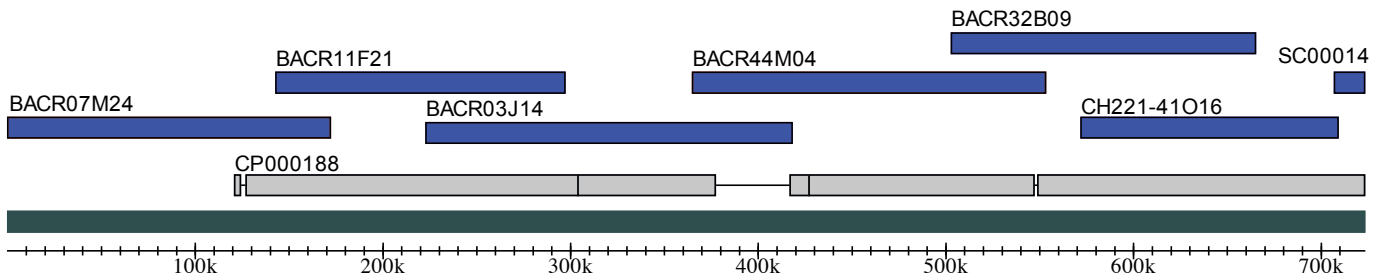

### 2RHet.3

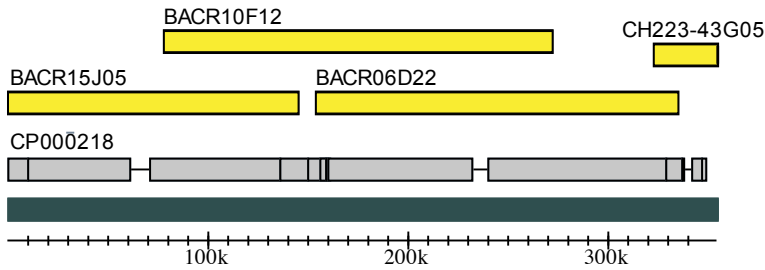

### 2RHet.4

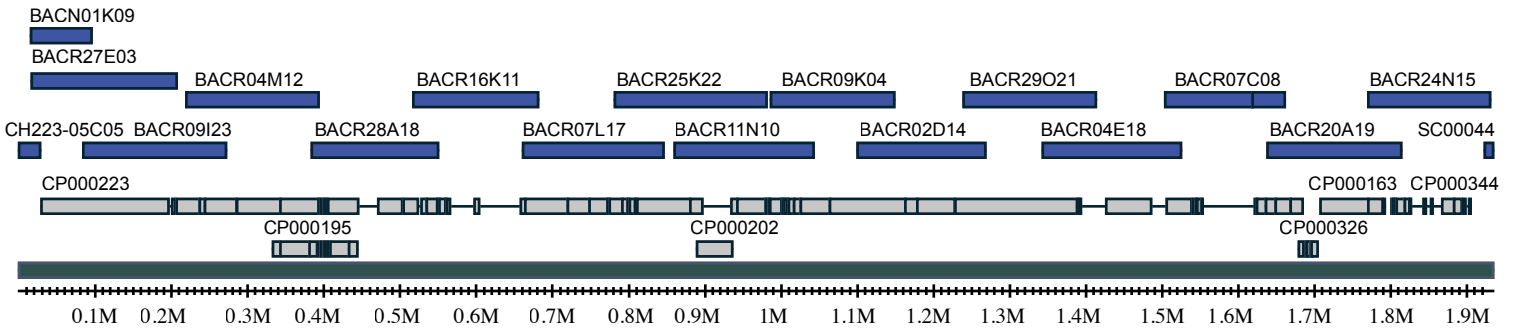

### 2RHet.5

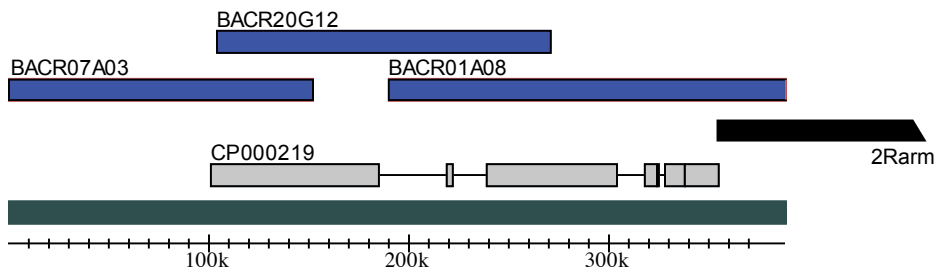

### 3LHet.1

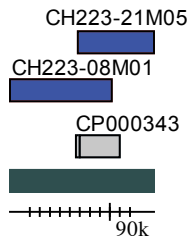

### 3LHet.2

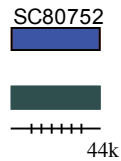

### 3LHet.3

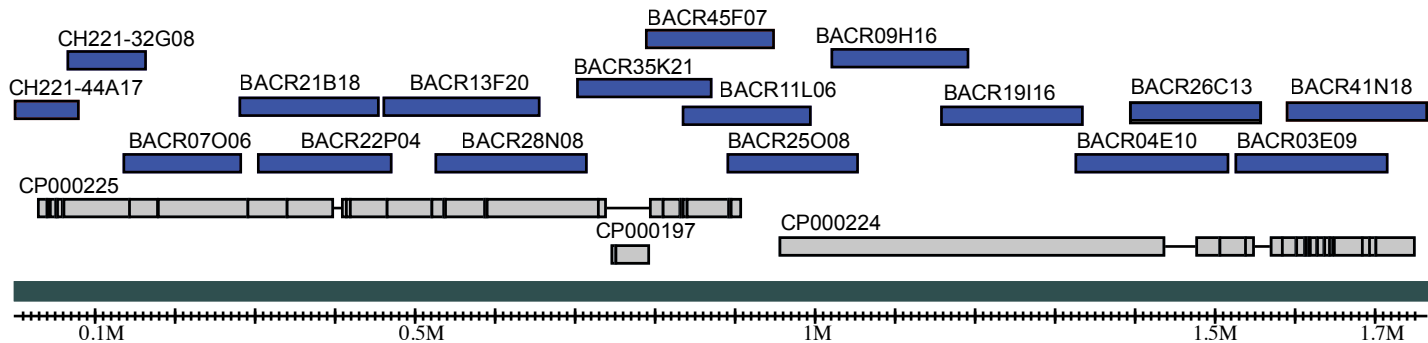

### 3LHet.4

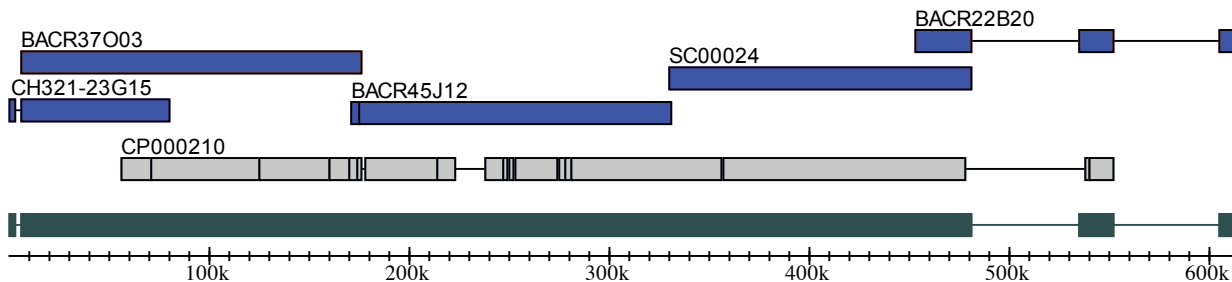

### 3LHet.5

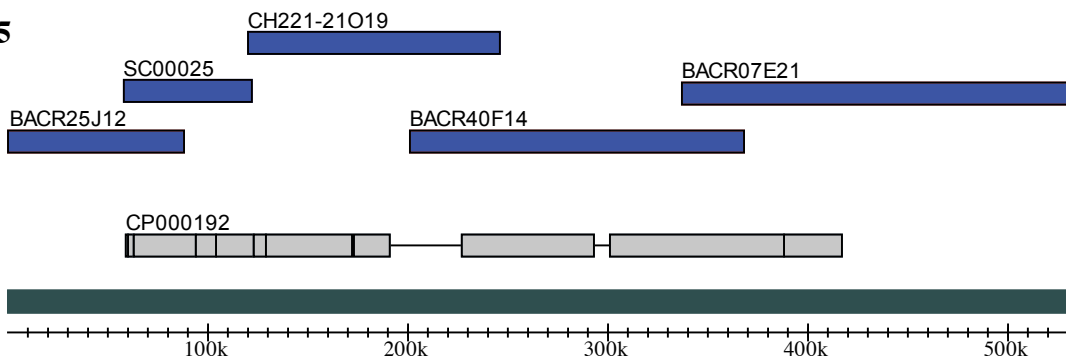

### 3LHet.6

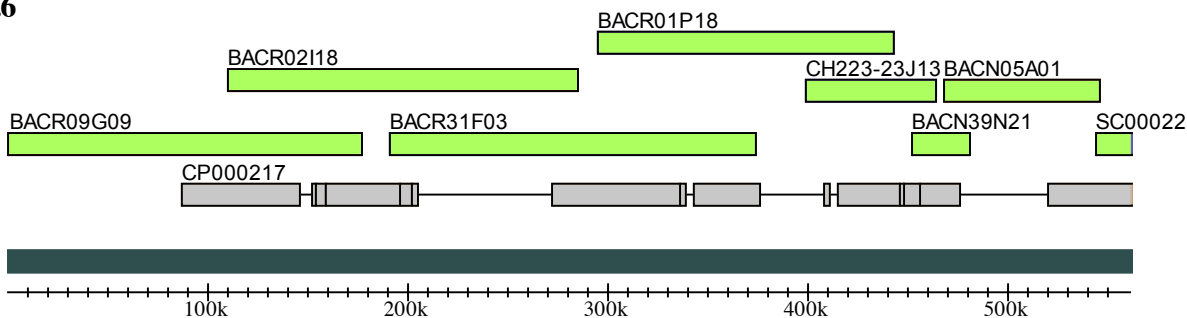

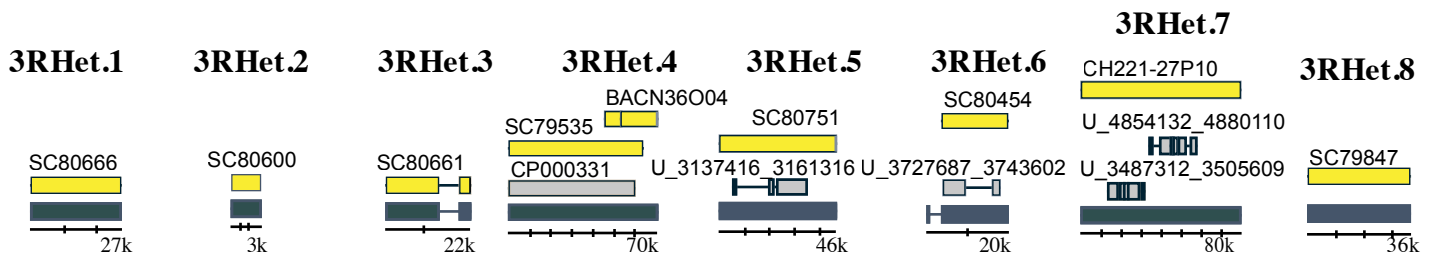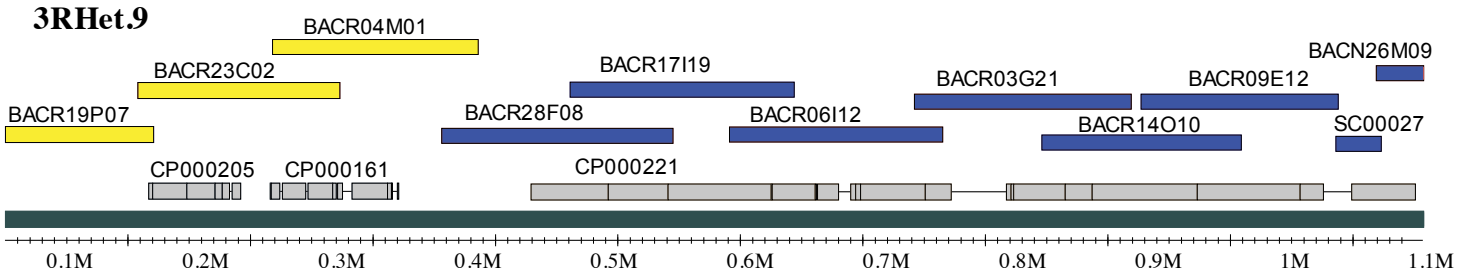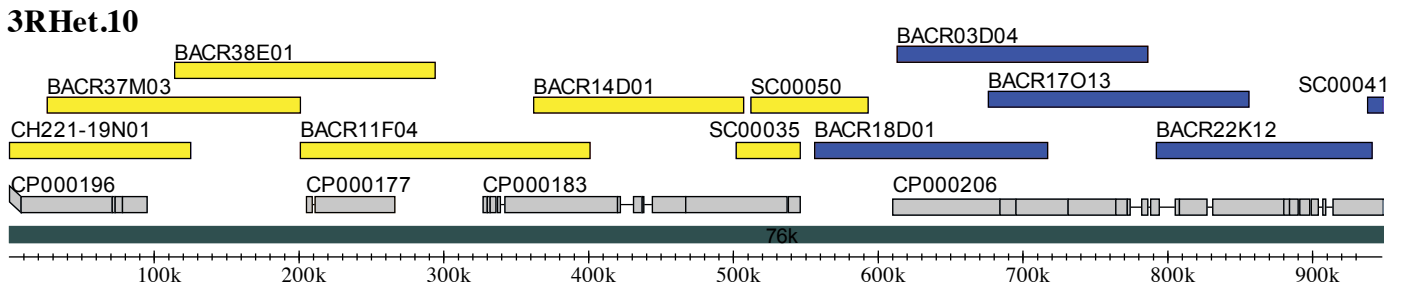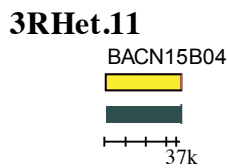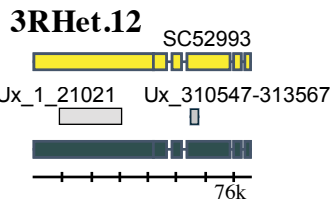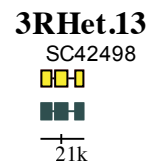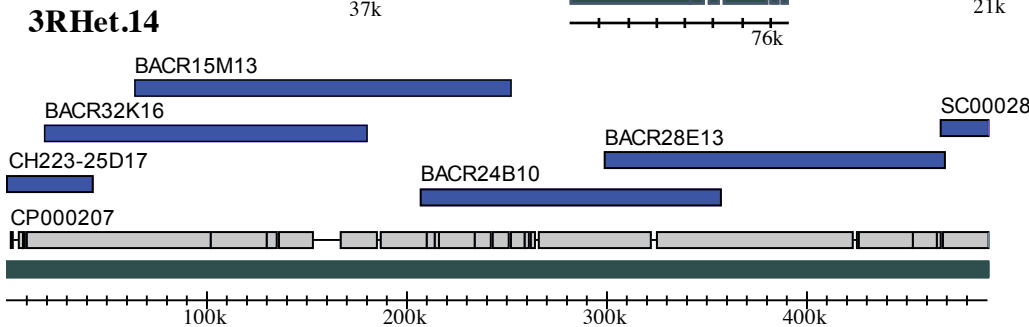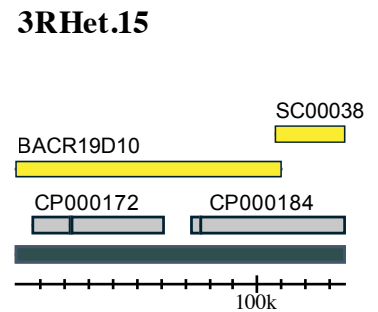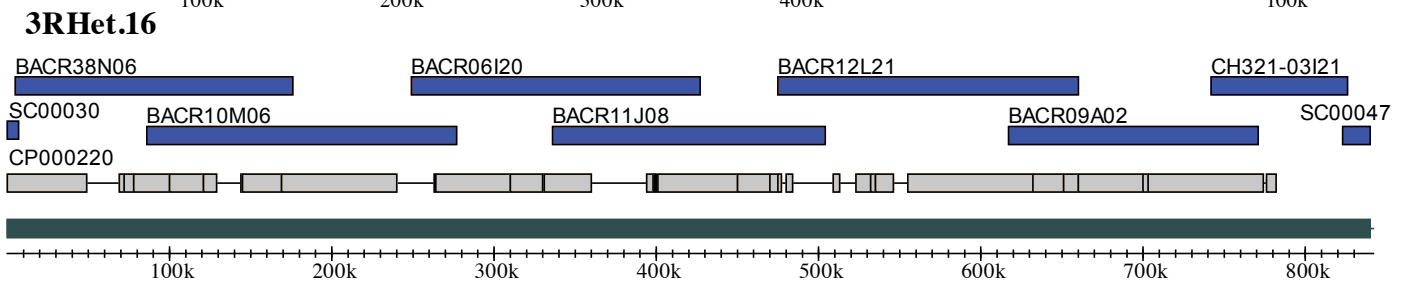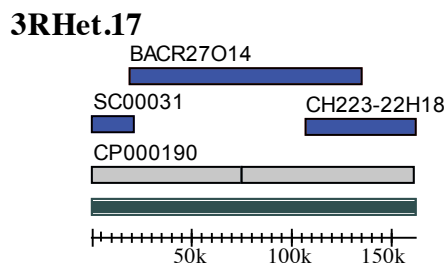

*Pp1-Y1*

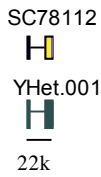

*kl5*

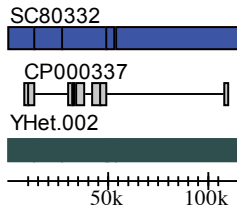

*PRY*

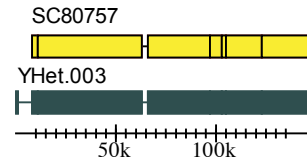

*kl3*

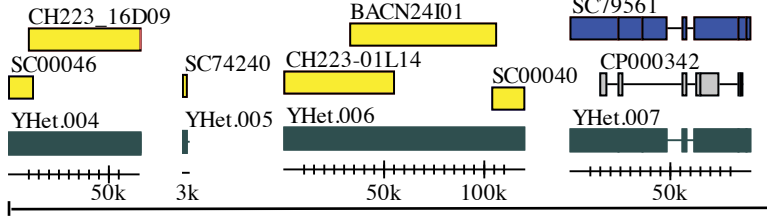

*kl2*

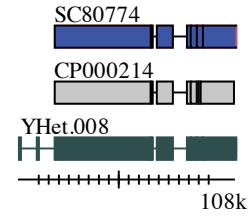

*ARY*

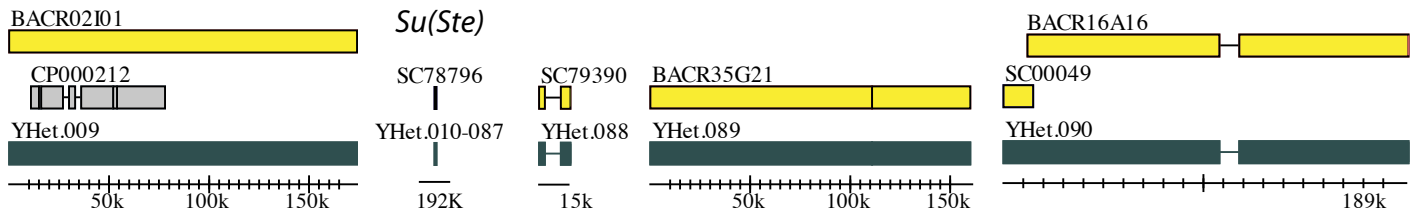

*Ppr-Y*

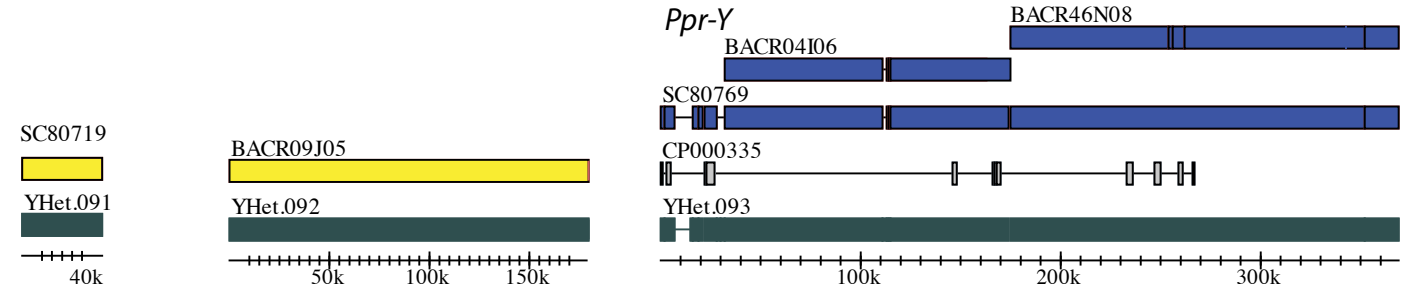

*WDY*

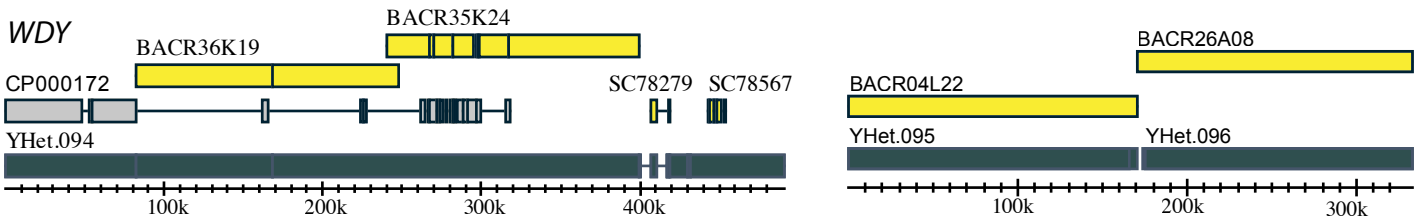

*FDY*

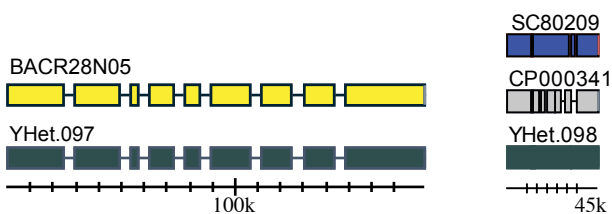

*Mst35Y*

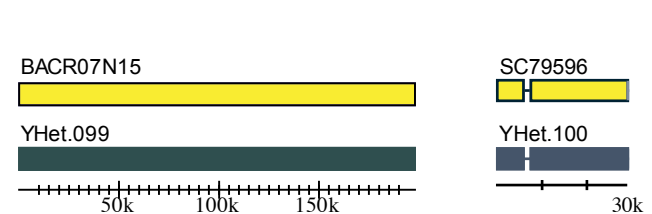

*Mst77Y*

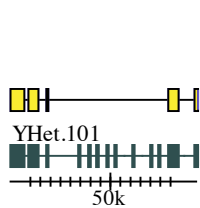

*18HT*

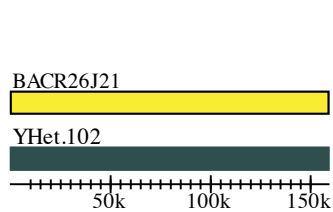

*Pp1-Y2*

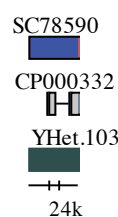

*ORY*

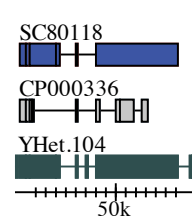

*CCY*

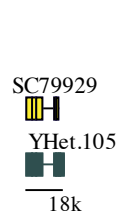

Supplement: supp_gr.185579.114_FigureS14.pdf [file supp_gr.185579.114_FigureS14.pdf]
