# Supplementary figures and images for: The Release 6 reference sequence of the Drosophila melanogaster genome
Source: PubMed Central journal article supplement — Genome Res. 2015 Mar;25(3):445–58. doi: 10.1101/gr.185579.114 (PMC4352887; doi:10.1101/gr.185579.114), 2015-03

A.

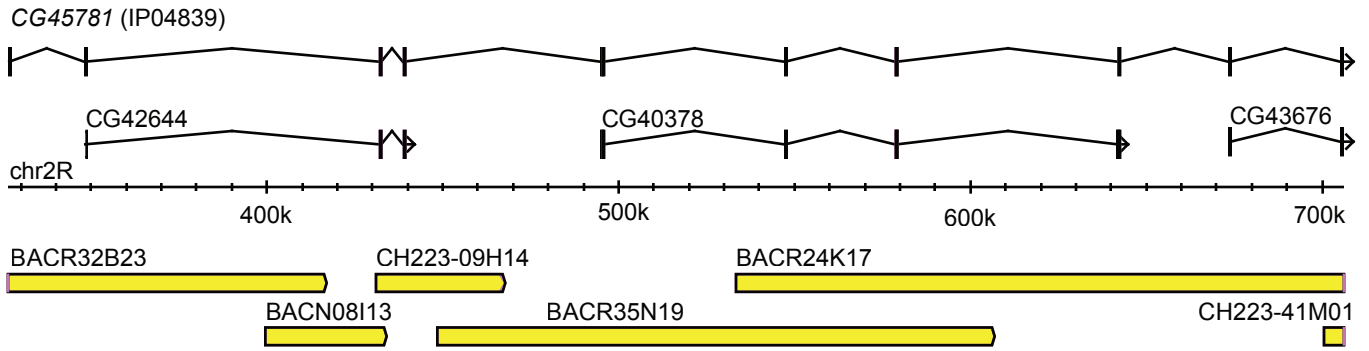

B.

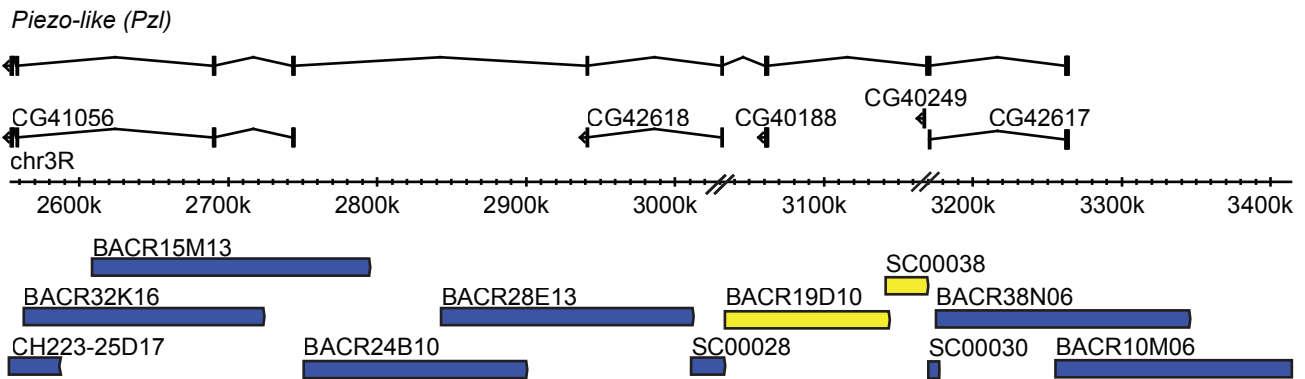

Supplement: supp_gr.185579.114_FigureS15.pdf [file supp_gr.185579.114_FigureS15.pdf]

A.

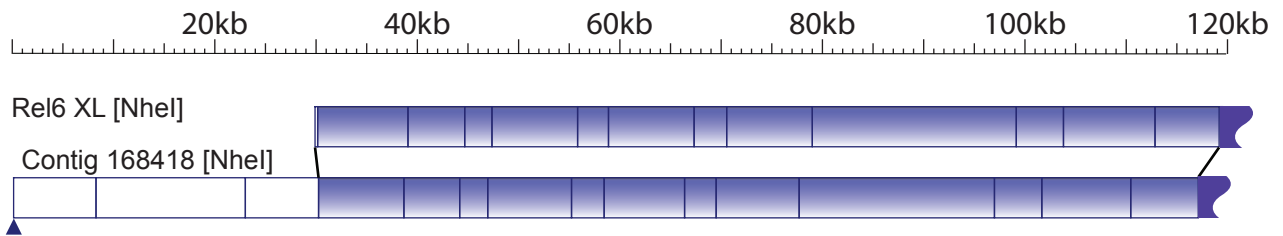

B.

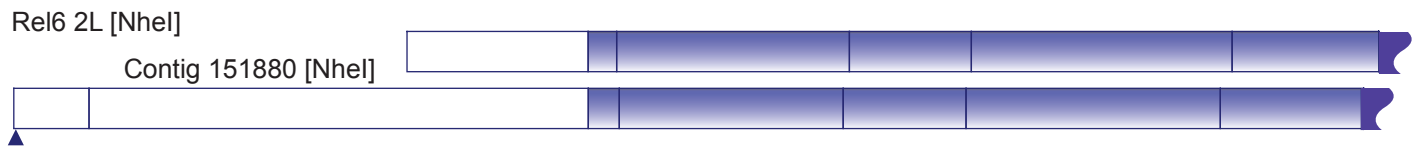

C.

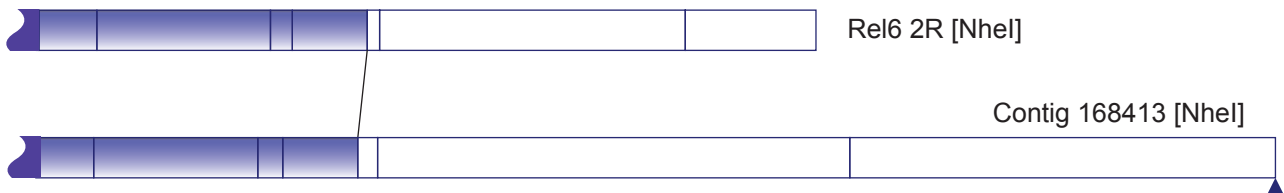

D.

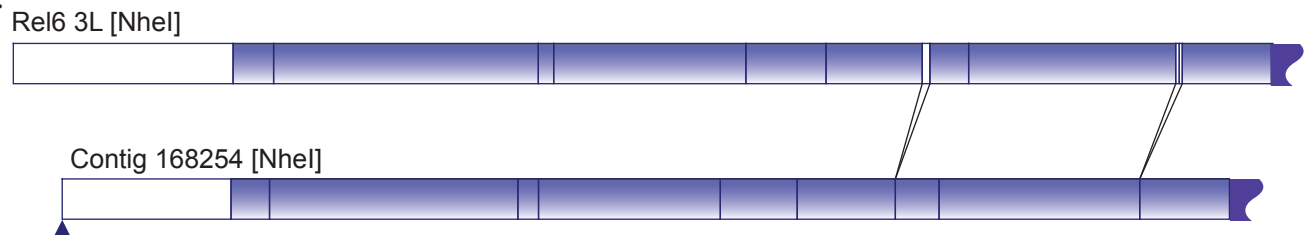

E.

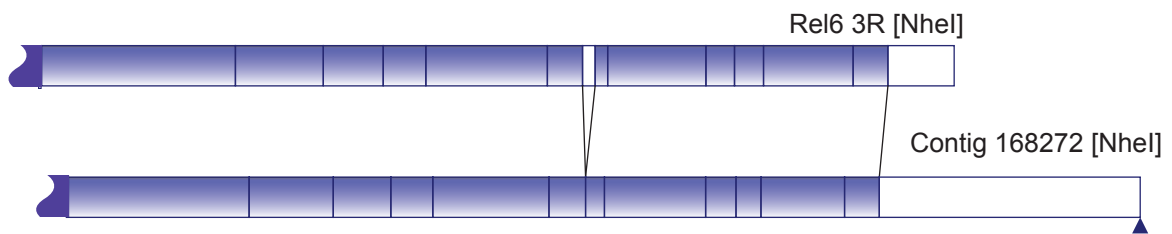

F.

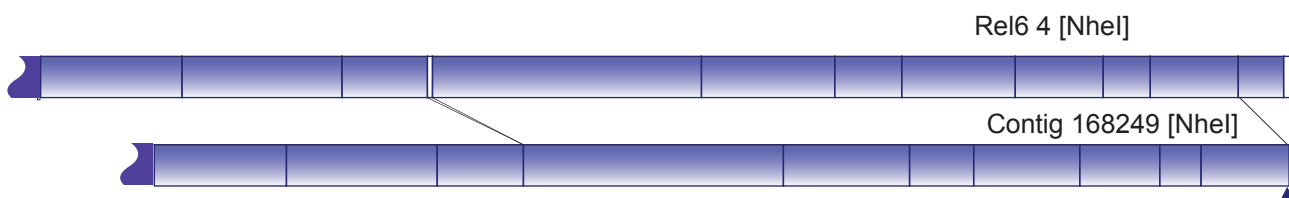

Supplement: supp_gr.185579.114_FigureS17.pdf [file supp_gr.185579.114_FigureS17.pdf]

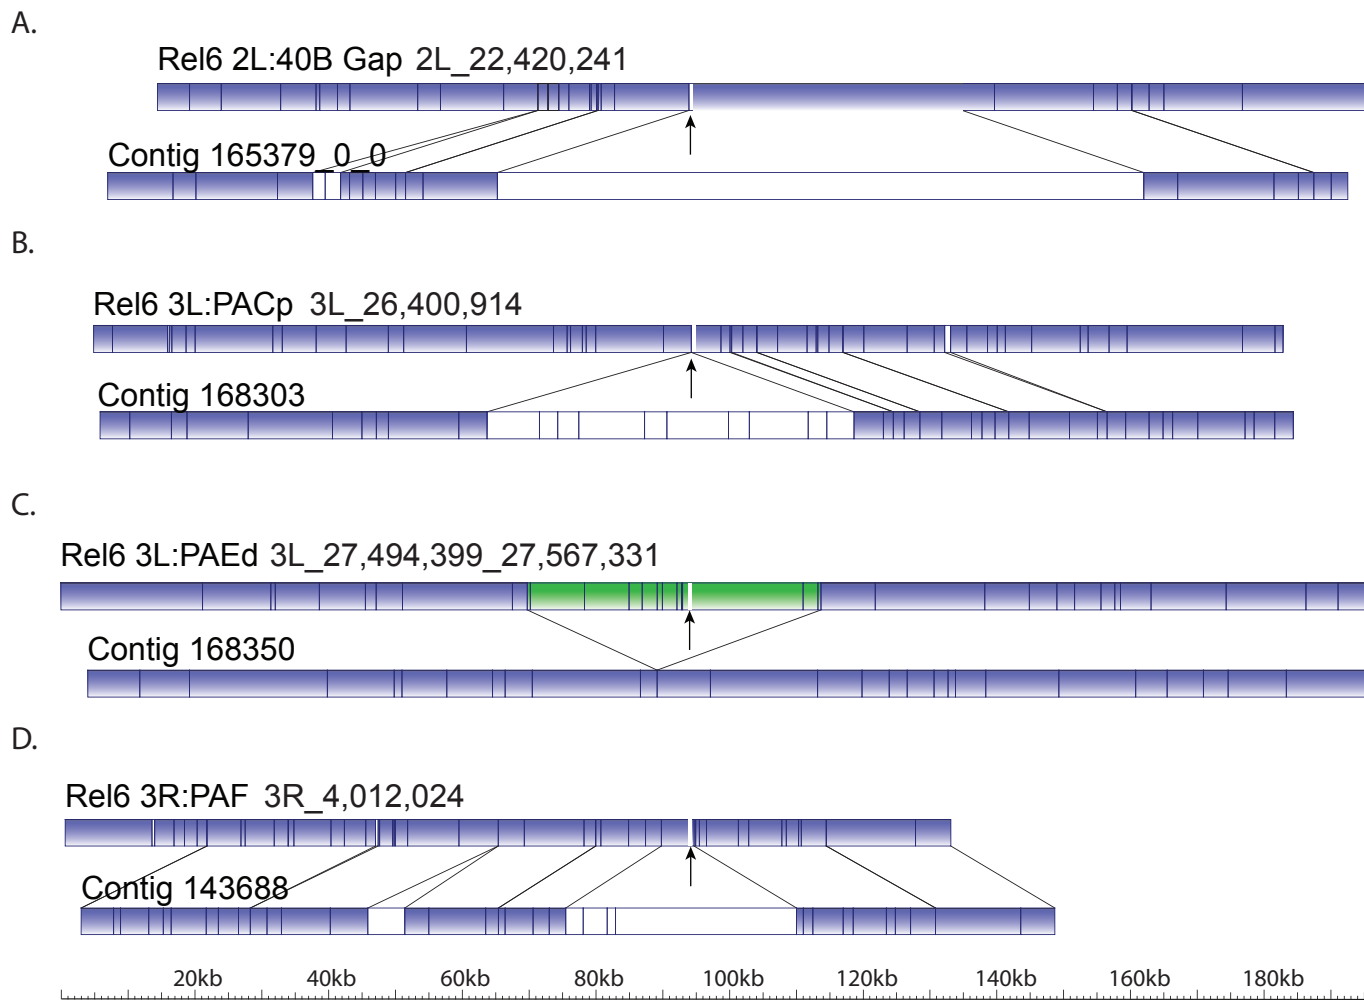

Supplement: supp_gr.185579.114_FigureS18.pdf [file supp_gr.185579.114_FigureS18.pdf]
